# Supplementary material for: Diagnostic Performance of Dynamic Whole-Body Patlak [18F]FDG-PET/CT in Patients with Indeterminate Lung Lesions and Lymph Nodes
Source: MDPI journal article supplement (doi:10.3390/jcm12123942), 2023-06-09
Supplement: s1 [file s1]

**Supplementary Table S1.** Extended AUC values of pulmonary lesions (n=32, prevalence: 52.4%).

|                          | <b>AUC</b> | <b>Std.Error</b> | <b>95% CI</b> | <b>p-value</b> |
|--------------------------|------------|------------------|---------------|----------------|
| <b>SUVmean</b>           | 0.827      | 0.073            | 0.684 - 0.970 | 0.003          |
| <b>SUVmax</b>            | 0.823      | 0.075            | 0.676 – 0.969 | 0.003          |
| <b>SUVpeak</b>           | 0.861      | 0.066            | 0.731 – 0.992 | 0.001          |
| <b>MR-FDGmean</b>        | 0.887      | 0.057            | 0.775-1.000   | <0.001         |
| <b>MR-FDGmax</b>         | 0.887      | 0.058            | 0.774 – 1.000 | <0.001         |
| <b>MR-FDGpeak</b>        | 0.896      | 0.055            | 0.789 – 1.000 | <0.001         |
| <b>Patlak Ki-FDGmean</b> | 0.861      | 0.065            | 0.735-0.988   | 0.001          |
| <b>Patlak Ki-FDGmax</b>  | 0.855      | 0.066            | 0.726 – 0.984 | 0.001          |
| <b>Patlak Ki-FDGpeak</b> | 0.872      | 0.063            | 0.750 – 0.995 | 0.001          |
| <b>DV-FDGmean</b>        | 0.818      | 0.075            | 0.671-0.965   | 0.004          |
| <b>DV-FDGmax</b>         | 0.816      | 0.075            | 0.669 – 0.963 | 0.004          |
| <b>DV-FDGpeak</b>        | 0.831      | 0.073            | 0.689 – 0.974 | 0.002          |

**Supplementary Table S2.** Extended AUC values of thoracic lymph nodes (n=65, prevalence: 18.5%).

|                          | <b>AUC</b> | <b>Std.Error</b> | <b>95% CI</b> | <b>p-value</b> |
|--------------------------|------------|------------------|---------------|----------------|
| <b>SUVmean</b>           | 0.993      | 0.007            | 0.979 – 1.000 | < 0.001        |
| <b>SUVmax</b>            | 0.995      | 0.006            | 0.984 – 1.000 | < 0.001        |
| <b>SUVpeak</b>           | 0.995      | 0.006            | 0.984 – 1.000 | < 0.001        |
| <b>MR-FDGmean</b>        | 0.987      | 0.011            | 0.966 – 1.000 | < 0.001        |
| <b>MR-FDGmax</b>         | 0.994      | 0.007            | 0.980 - 1.000 | < 0.001        |
| <b>MR-FDGpeak</b>        | 0.991      | 0.009            | 0.974 – 1.000 | < 0.001        |
| <b>Patlak Ki-FDGmean</b> | 0.958      | 0.034            | 0.891 – 1.000 | < 0.001        |
| <b>Patlak Ki-FDGmax</b>  | 0.984      | 0.012            | 0.961 – 1.000 | < 0.001        |
| <b>Patlak Ki-FDGpeak</b> | 0.977      | 0.016            | 0.945 – 1.000 | < 0.001        |
| <b>DV-FDGmean</b>        | 0.948      | 0.028            | 0.893 – 1.000 | < 0.001        |
| <b>DV-FDGmax</b>         | 0.975      | 0.016            | 0.943 – 1.000 | < 0.001        |
| <b>DV-FDGpeak</b>        | 0.972      | 0.018            | 0.938 – 1.000 | < 0.001        |
